# Supplementary material for: Designing the recognition of Sn2+ ions and antioxidants: N-heterocyclic organosilatranes and their magnetic nanocomposites
Source: Royal Society of Chemistry journal article supplement (doi:10.1039/c9nj06363c), 2020-01-01
Supplement: c9nj06363c1.pdf [file c9nj06363c1.pdf]

## Designing the recognition of Sn<sup>2+</sup> ions and Antioxidants: N-Heterocyclic Organosilatrane and their magnetic nanocomposites

Gurjaspreet Singh<sup>a</sup>, Diksha<sup>a</sup>, Akshpreet Singh<sup>a</sup>, Sanchita<sup>a</sup>, Geetikasharma<sup>a</sup>, Shilpy, Cristóbal Espinosa-Ruíz<sup>b</sup>, María Angeles Esteban<sup>b</sup>

<sup>a</sup>Department of Chemistry, Panjab University, Chandigarh, 160014, India

<sup>b</sup>Department of Cell Biology & Histology, Faculty of Biology, University of Murcia, 30100 Murcia, Spain

\*Corresponding Authors

Prof. Gurjaspreet Singh

Department of Chemistry and Centre of Advanced Studies

Panjab University, Chandigarh, India

Email: gjpsingh@pu.ac.in

| Entry                                                 | Page No. |
|-------------------------------------------------------|----------|
| <sup>1</sup> H NMR spectrum of compound 2a ( Fig.S1)  | 2        |
| <sup>1</sup> H NMR spectrum of compound 2b ( Fig.S2)  | 2        |
| <sup>1</sup> H NMR spectrum of compound 2c ( Fig.S3)  | 3        |
| <sup>1</sup> H NMR spectrum of compound 3a ( Fig.S4)  | 3        |
| <sup>1</sup> H NMR spectrum of compound 3b ( Fig.S5)  | 4        |
| <sup>1</sup> H NMR spectrum of compound 3c ( Fig.S6)  | 4        |
| <sup>13</sup> C NMR spectrum of compound 3a (Fig. S7) | 5        |
| <sup>13</sup> C NMR spectrum of compound 3b (Fig. S8) | 5        |
| <sup>13</sup> C NMR spectrum of compound 3c (Fig. S9) | 6        |
| Mass spectrum of compound 3a (Fig. S10)               | 6        |
| Mass spectrum of compound 3a (Fig. S11)               | 7        |
| Mass spectrum of compound 3a (Fig. S12)               | 7        |



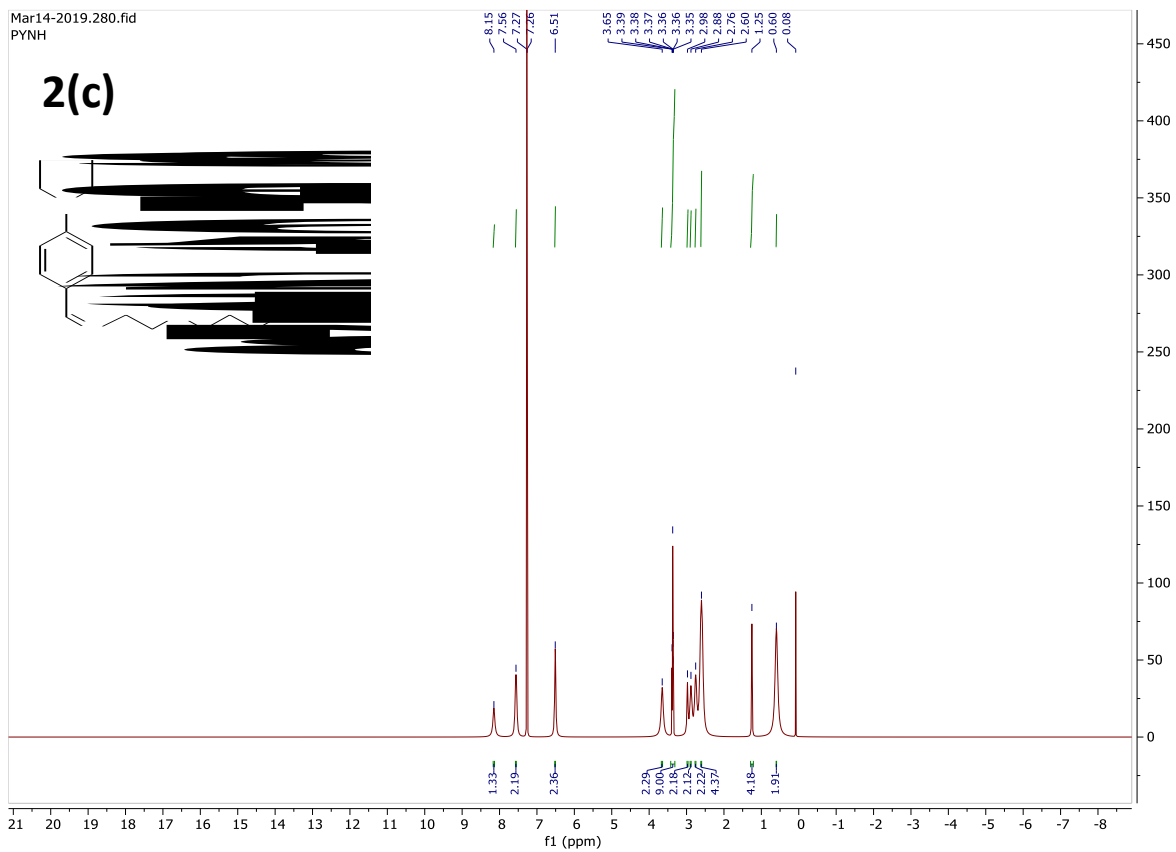

Fig.S3  $^1\text{H}$  NMR spectrum of compound 2c

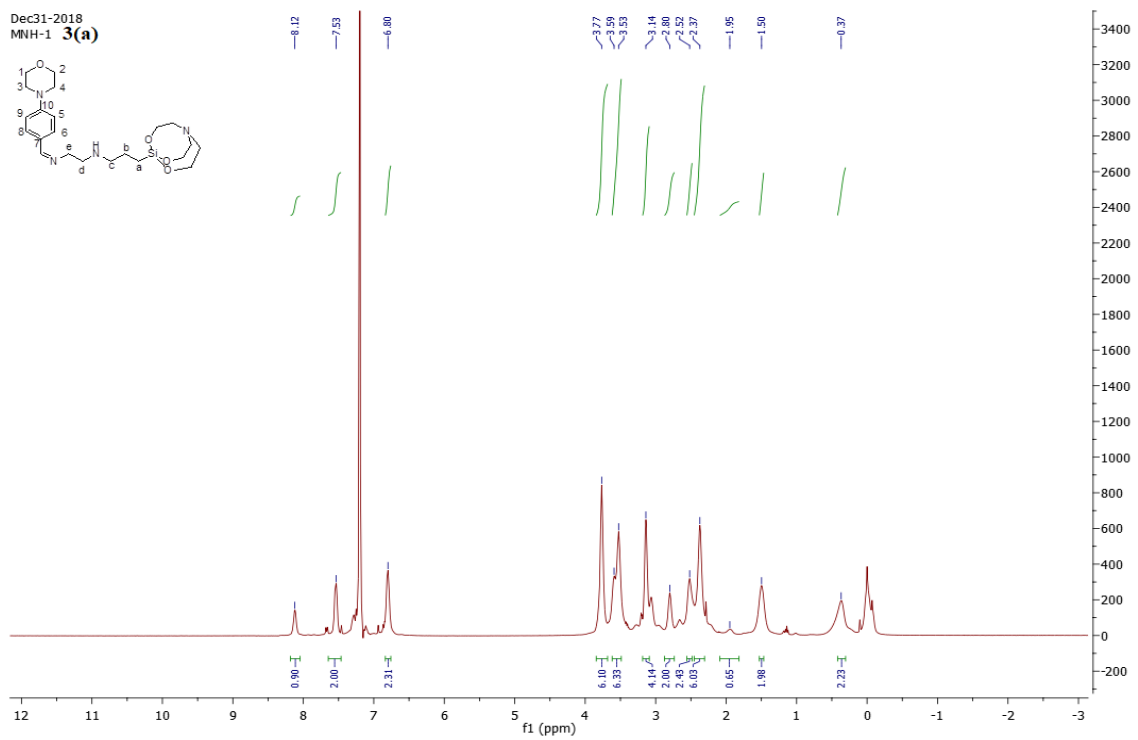

Fig.S4  $^1\text{H}$  NMR spectrum of compound 3a

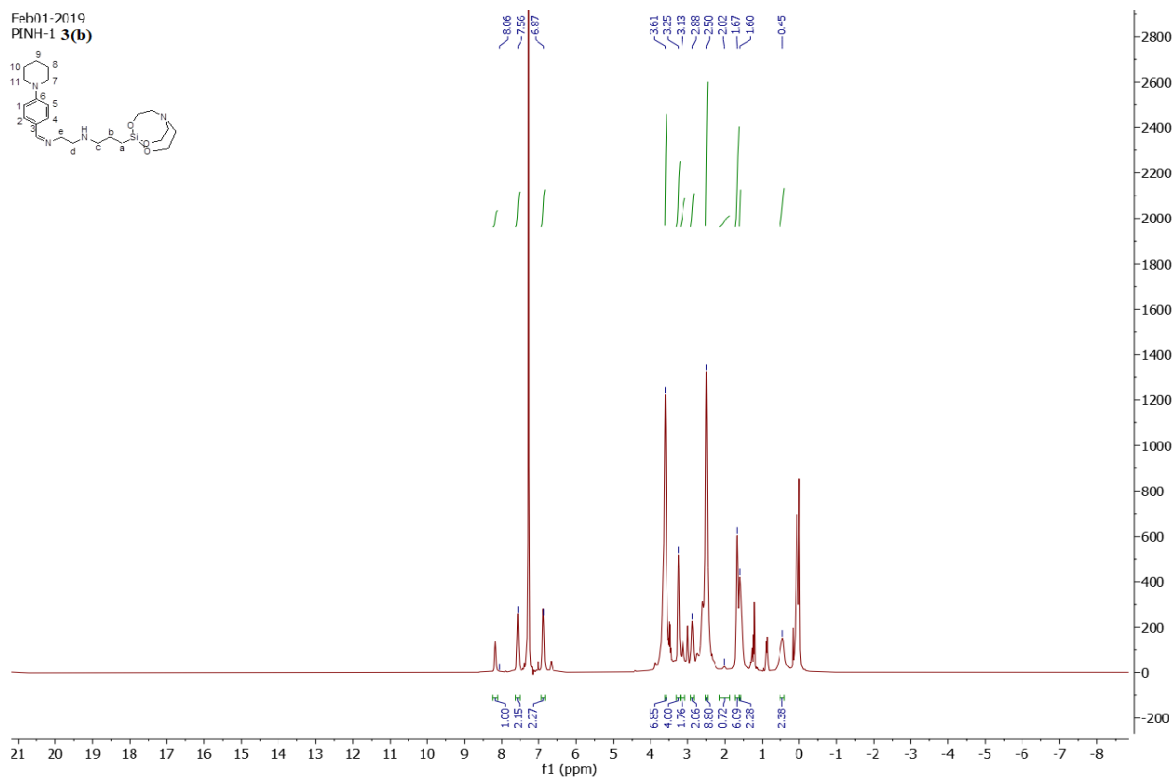

Fig.S5  $^1\text{H}$  NMR spectrum of compound 3b

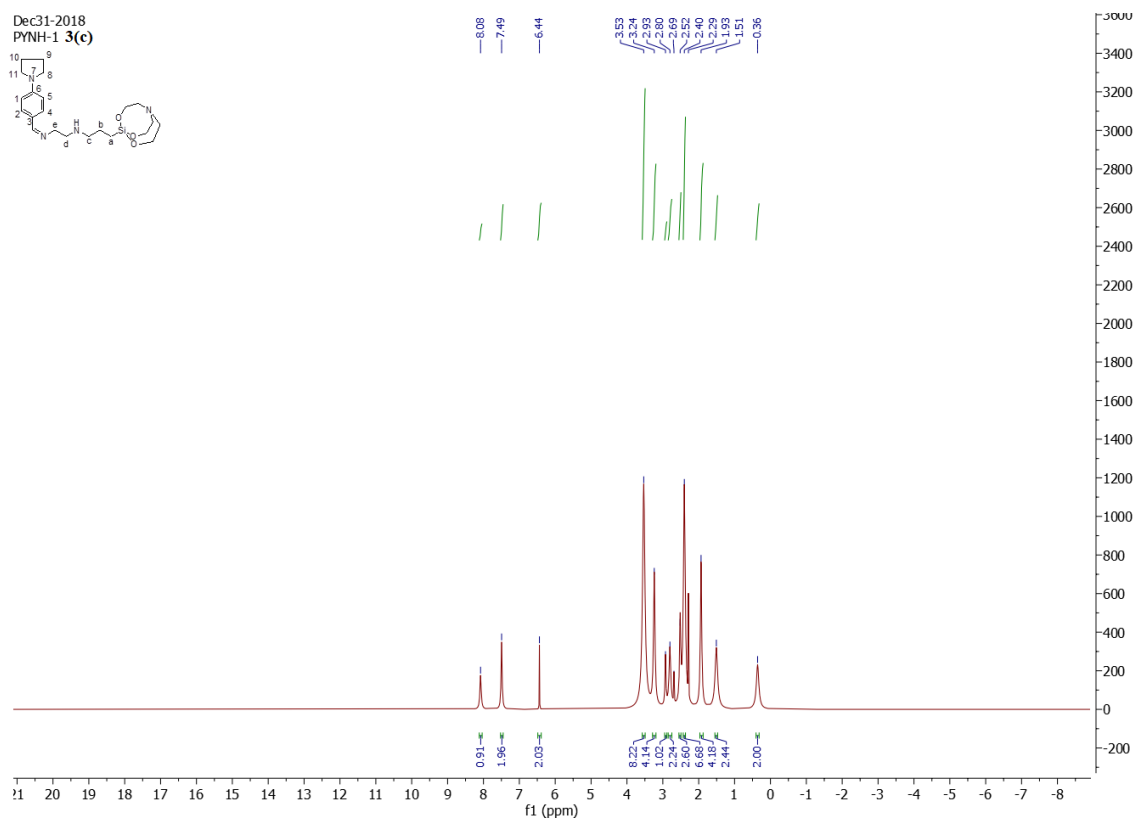

Fig.S6  $^1\text{H}$  NMR spectrum of compound 3c

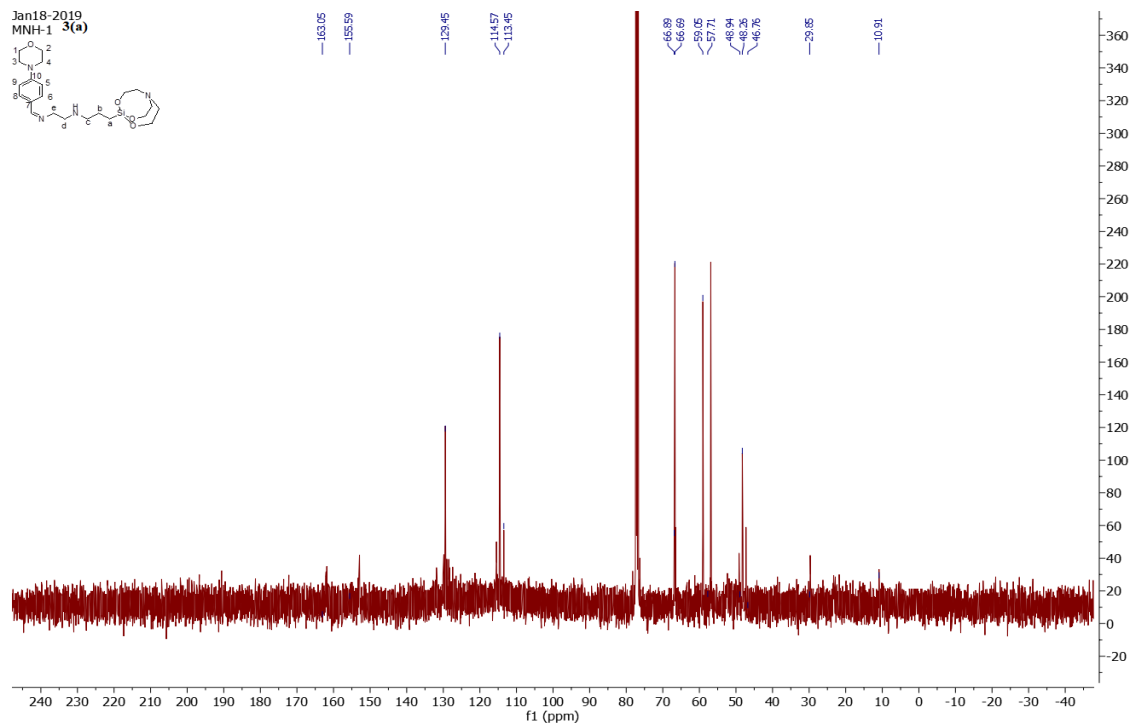

Fig.S7  $^1\text{H}$  NMR spectrum of compound 3a

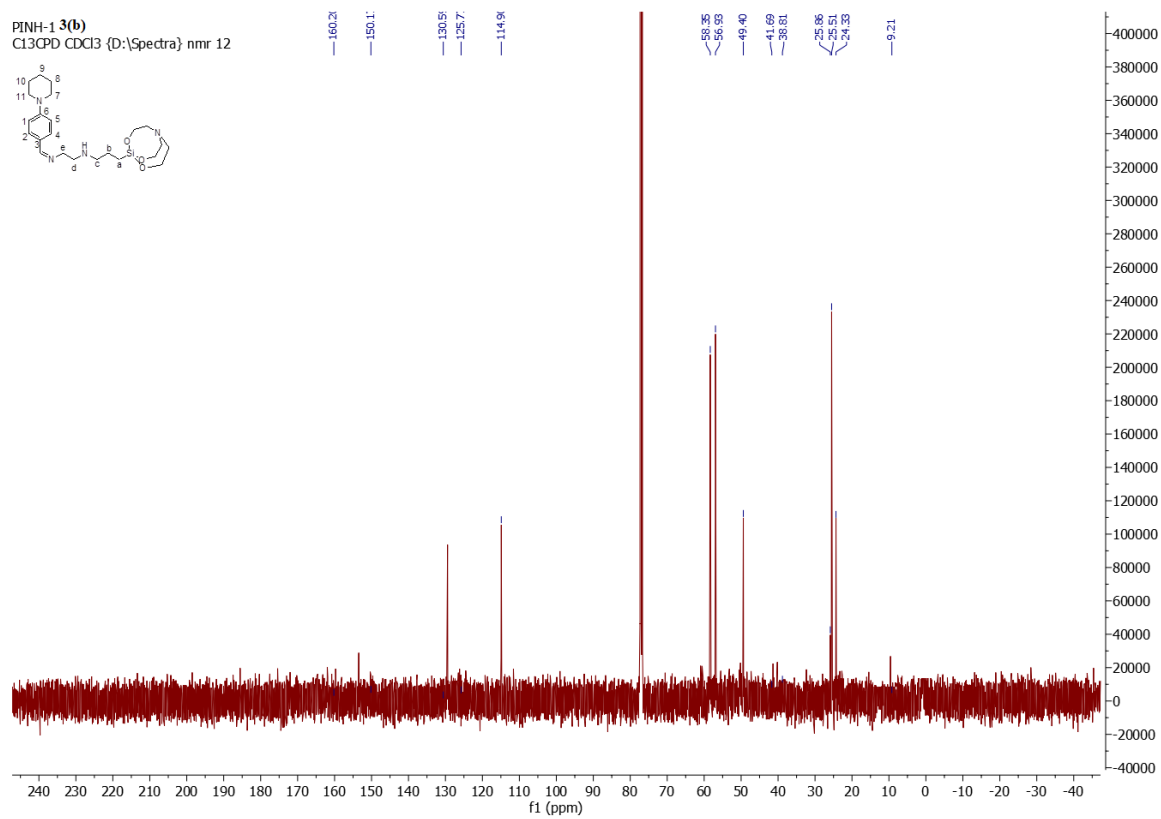

Fig.S8  $^1\text{H}$  NMR spectrum of compound 3b

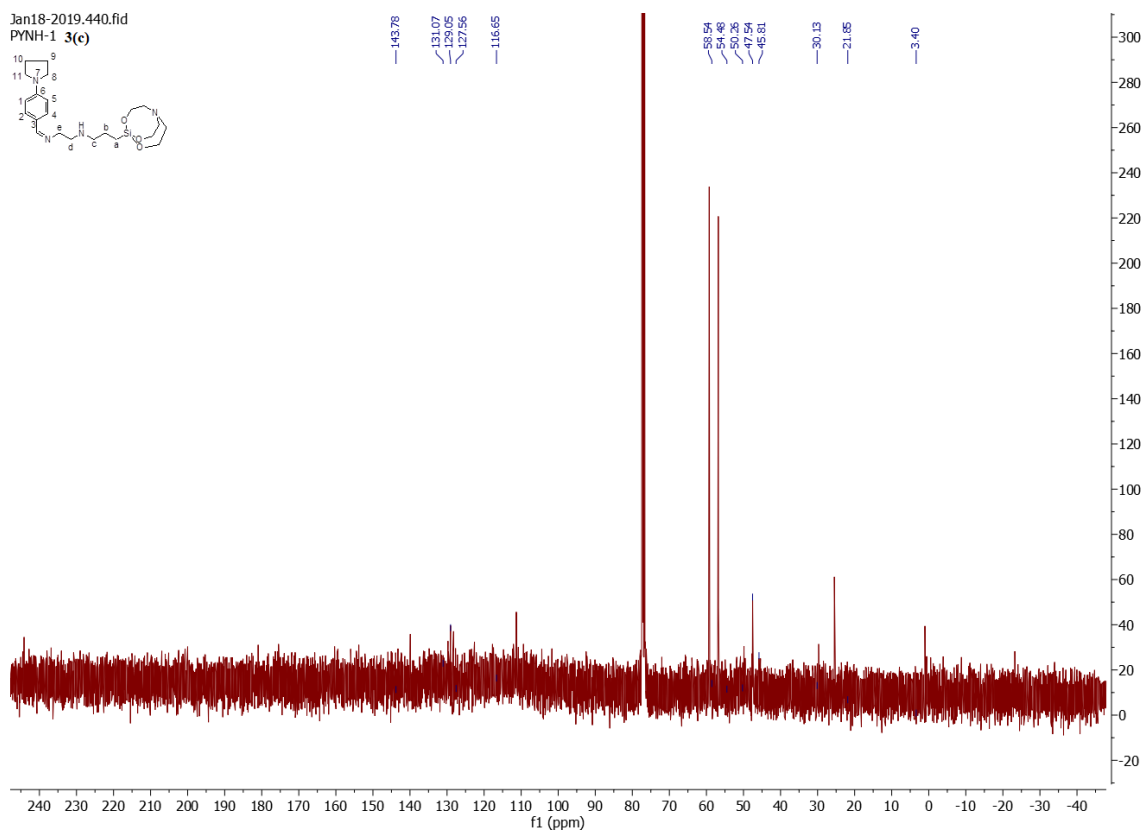

Fig.S9  $^1\text{H}$  NMR spectrum of compound **3c**

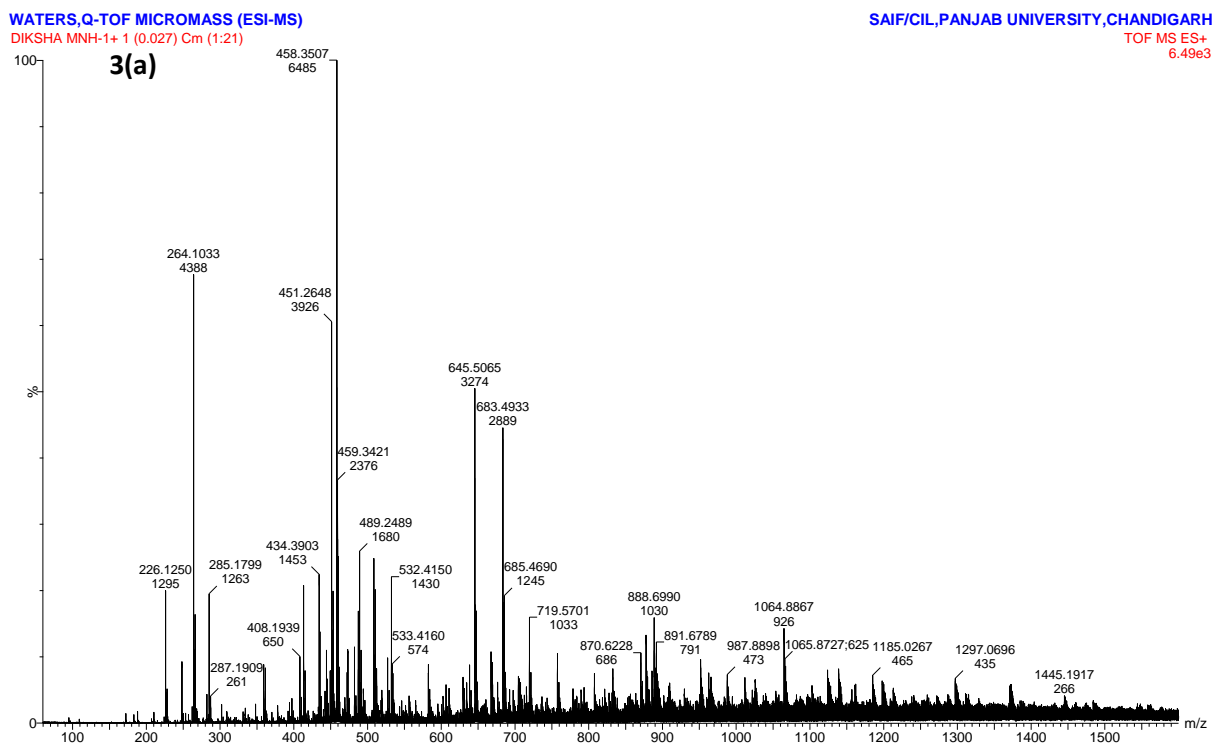

Fig.S10 Mass spectrum of compound **3a**

Sample Name : PINH-1  
Test Name : D MASS-1  
110419-PINH-1 7 (0.128) Cm (5:15)

I.I.T.ROPAR

XEVO G2-XS QTOF

1: TOF MS ES+  
3.51e7

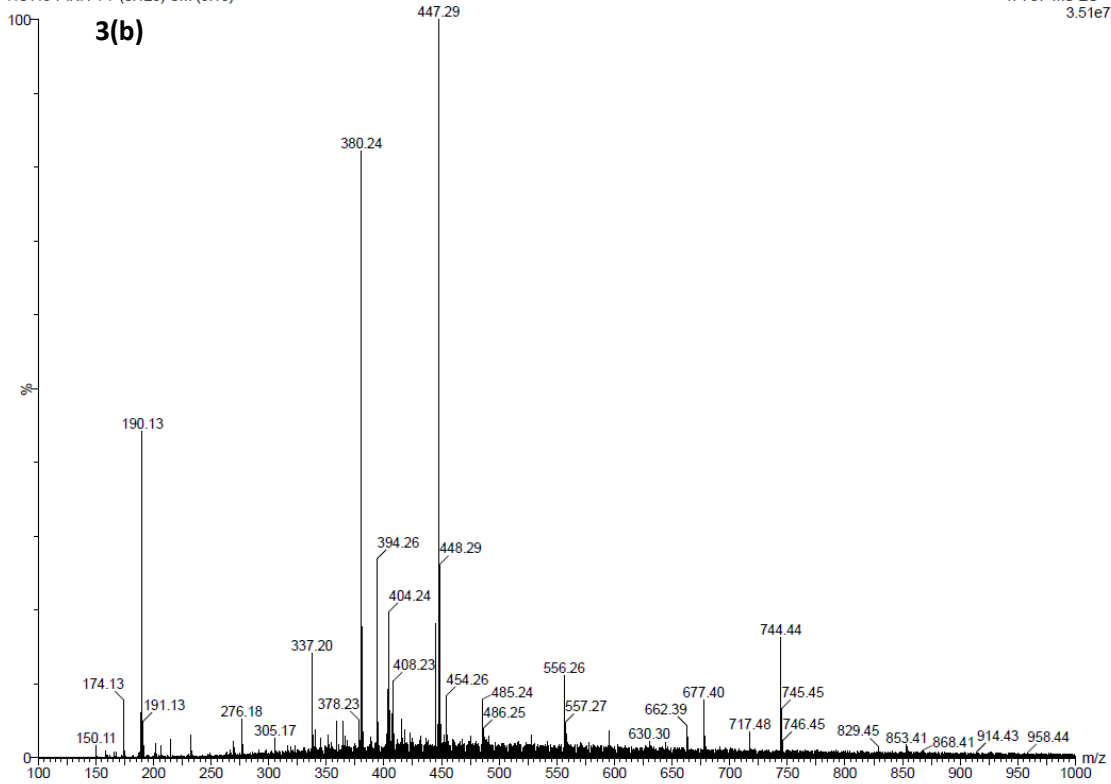

Fig.S11 Mass spectrum of compound 3b

WATERS,Q-TOF MICROMASS (ESI-MS)  
DIKSHA PYNH-1 5 (0.106) Cm (4:13)

SAIF/CIL,PANJAB UNIVERSITY,CHANDIGARH  
TOF MS ES+  
1.97e4

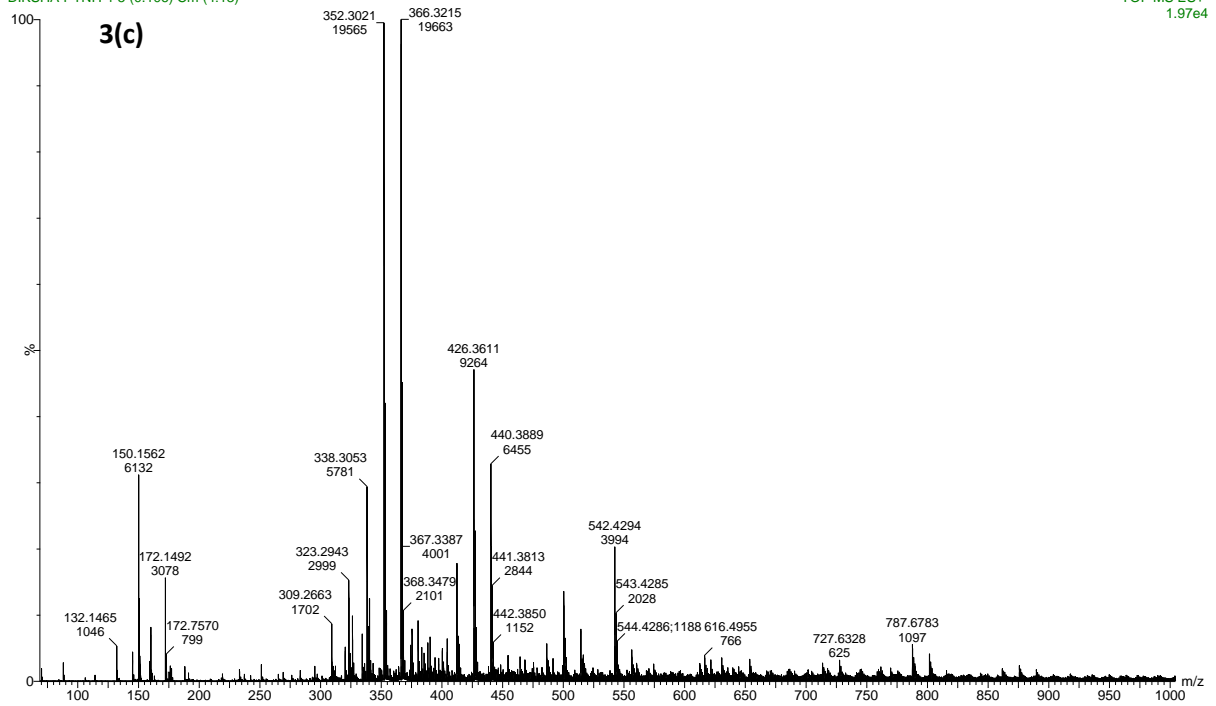

Fig.S12 Mass spectrum of compound 2a
